# Supplementary material for: Polygenes, Risk Prediction, and Targeted Prevention of Breast Cancer
Source: Atypon-hosted journal article supplement (doi:10.1056/nejmsa0708739), 2008-06-25
Supplement: nejm_pharoah_2796sa1.pdf [file nejm_pharoah_2796sa1.pdf]

## Supplementary Appendix

This appendix has been provided by the authors to give readers additional information about their work.

Supplement to: Pharoah PDP, Antoniou AC, Easton DF, Ponder BAJ. Polygenes, risk prediction, and targeted prevention of breast cancer. *N Engl J Med* 2008;358:2796-803.

## Pharoah 07-08739

### Appendix

For a single allele (i) of frequency  $p$ , relative risk  $R$  and log risk  $r$  the population attributable fraction is given by

$$\frac{2p(1-p)(R-1)}{2p(1-p)(R-1)+1} + \frac{(1-p)^2(R^2-1)}{(1-p)^2(R^2-1)+1}$$

The variance ( $V_i$ ) of the risk distribution due to that allele is given by

$$V_i = (1-p)^2 E^2 + 2p(1-p)(r-E)^2 + p^2(2r-E)^2$$

Where  $E$  is the expected value of  $r$  given by

$$E = 2p(1-p)r + 2p^2r$$

For multiple risk alleles the distribution of risk in the population tends towards the normal with variance

$$V = \sum V_i$$

The total genetic variance ( $V$ ) for all susceptibility alleles has been estimated to be 1.44 from twin and family studies. Thus the fraction of the genetic risk explained by a single allele is given by

$$V_i / V$$

**Supplementary table: Breast cancer incidence and all cause mortality data on which absolute risk estimates are based <sup>†</sup>.**

| <b>Age</b> | <b>Breast cancer incidence<br/>(per 100,000 pop)</b> | <b>All cause mortality<br/>(per 100,000 pop)</b> |
|------------|------------------------------------------------------|--------------------------------------------------|
| 15-19      | 0.2                                                  | 26                                               |
| 20-24      | 1.2                                                  | 29                                               |
| 25-29      | 8.3                                                  | 38                                               |
| 30-34      | 26                                                   | 53                                               |
| 35-39      | 63                                                   | 79                                               |
| 40-44      | 117                                                  | 133                                              |
| 45-49      | 183                                                  | 211                                              |
| 50-54      | 217                                                  | 348                                              |
| 55-59      | 258                                                  | 551                                              |
| 60-64      | 309                                                  | 918                                              |
| 65-69      | 304                                                  | 1592                                             |
| 70-74      | 309                                                  | 2691                                             |
| 75-79      | 328                                                  | 4310                                             |

<sup>†</sup> Office for National Statistics. Cancer Statistics registrations: registrations of cancer diagnosed in 2004, England.

Series MB1 No. 35. London, 2004
